# Supplementary material
Source: PubMed Central journal article supplement (PMC7710019)
Supplement: develop-147-185298-s1.pdf [file develop-147-185298-s1.pdf]

## SUPPLEMENTARY FIGURES

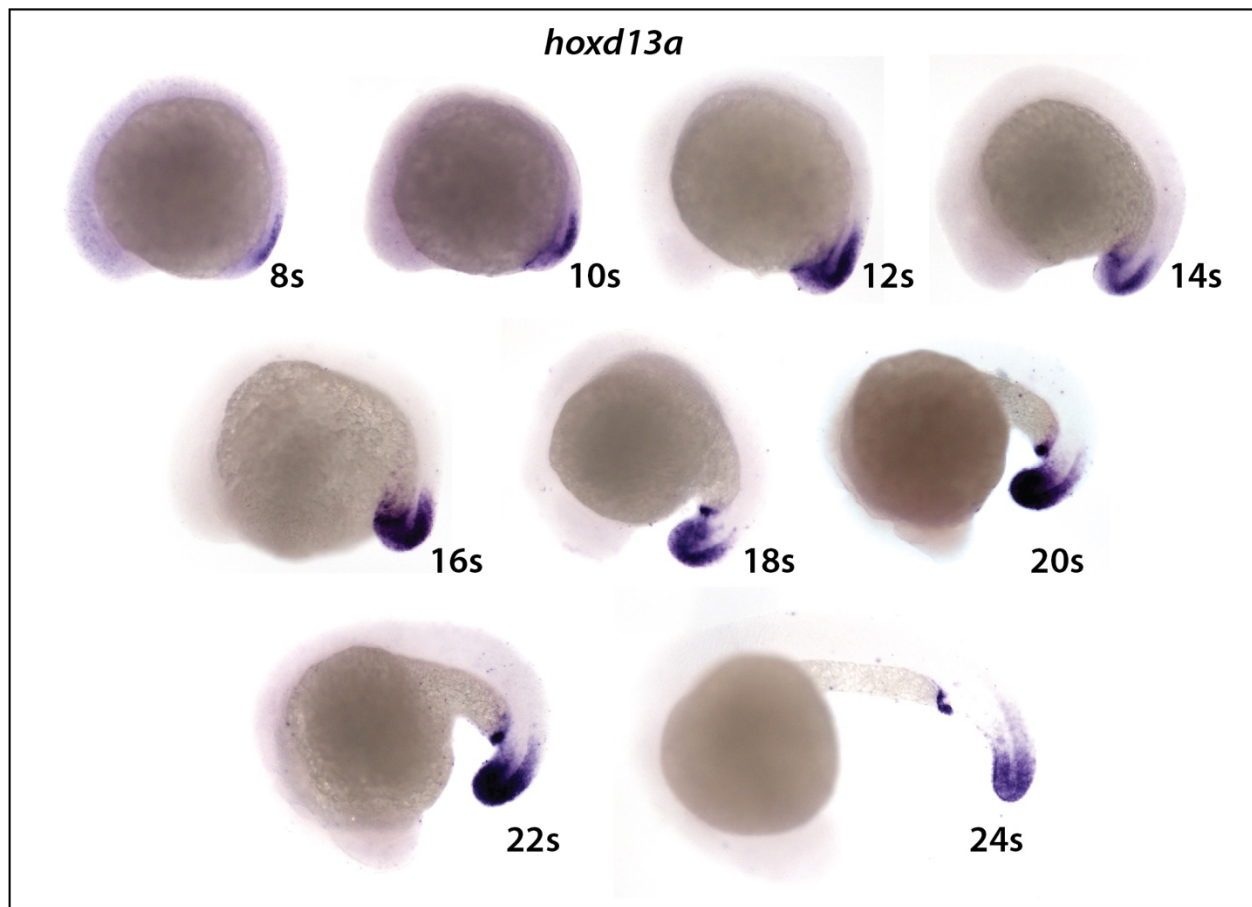

**Figure S1** *hoxd13a* is expressed from early stages of embryogenesis. Refers to Figure 1.

Expression of *hoxd13a* from 8s until the 24s. Embryos from 12s to 24s were developed for the same length of time. Embryos at 8s and 10s were developed twice as long.

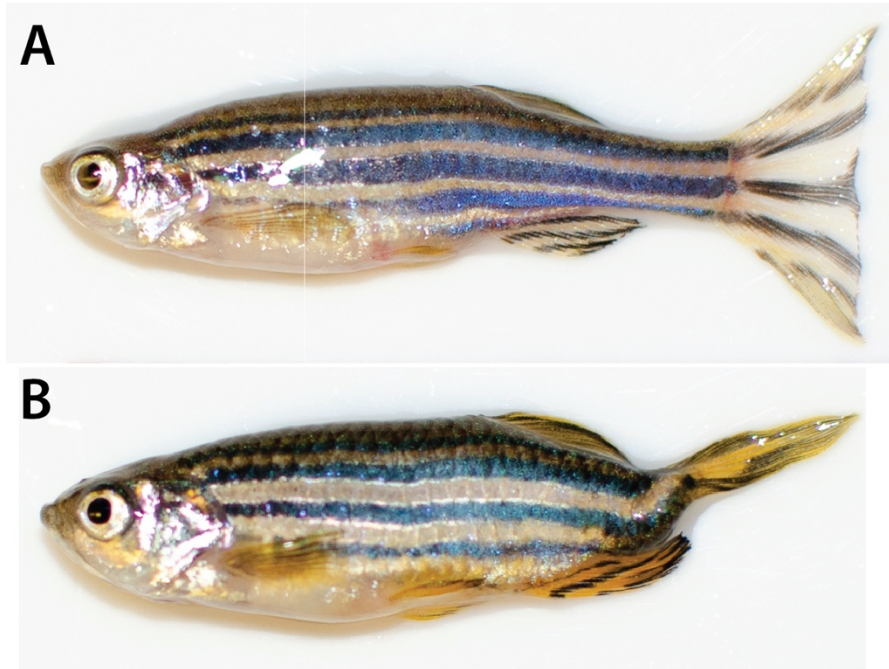

**Figure S2 Adult *hoxa13b;d13a* mutant. Refers to Figure 2.**

Shown is a  $ntl^{cs/cs};hoxa13b^{\Delta16/\Delta16};d13b^{ins4/-}$  mutant that survived to adulthood with severe posterior defects. Most fish with this degree of posterior defect die as larvae.

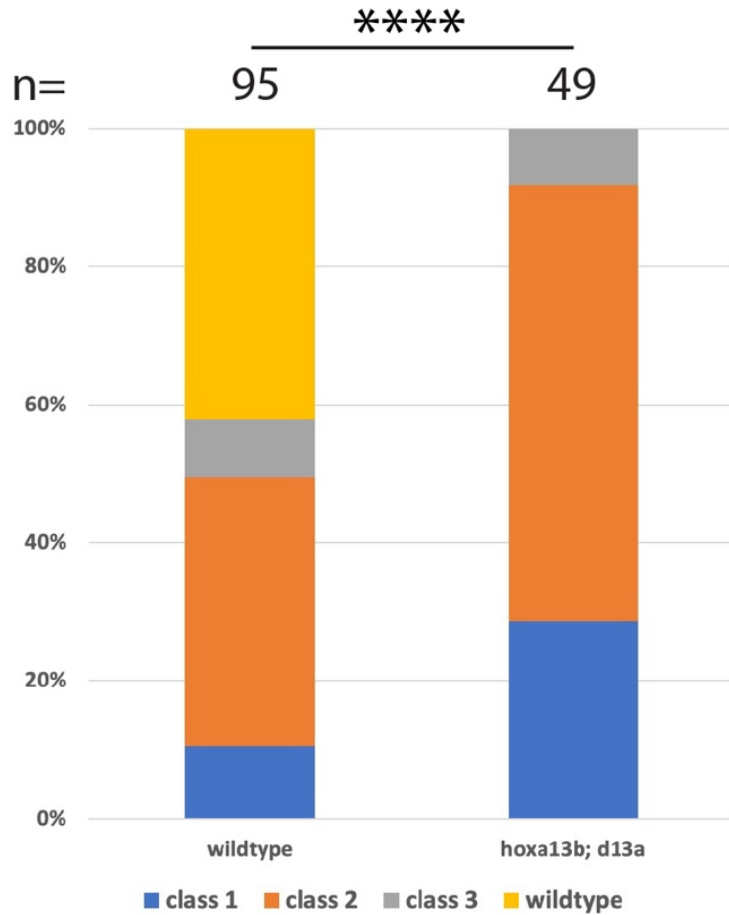

**Figure S3 *Hoxa13b;d13a* mutants in a *ntl* wildtype background are hypersensitive to *Tbxta* reduction. Refers to Figure 3.**

Embryos from a cross of wildtype or *hoxa13b;d13a* mutant fish (in a *ntl*<sup>+/+</sup> background) were injected with very low doses (0.2 ng) of a *tbxta* morpholino. The *hoxa13b;d13a* mutant fish show enhanced defects relative to wildtype fish. \*\*\*\* =  $p < 0.0001$ , Fisher's Exact test.

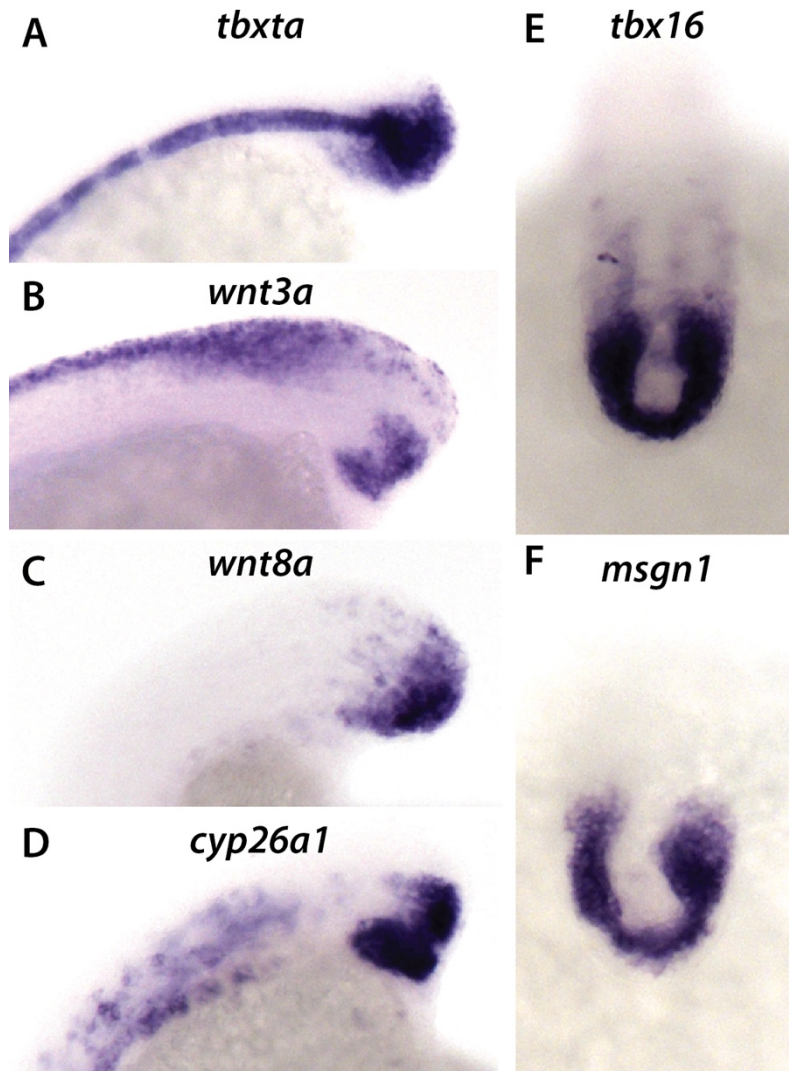

**Figure S4 Reduction of mesodermal gene expression in *nt1<sup>cs</sup>* embryos at 18.5° C. Refers to Figure 4.**

A-F) In situ hybridization of class 1 15s *nt1<sup>cs</sup>* homozygous embryos maintained at 18.5° C.

Compare to the wildtype expression patterns shown in Figure 4. The reduction of mesodermal genes is the same as observed in in *hoxa13;nt1<sup>cs</sup>* embryos maintained at 18.5°C.

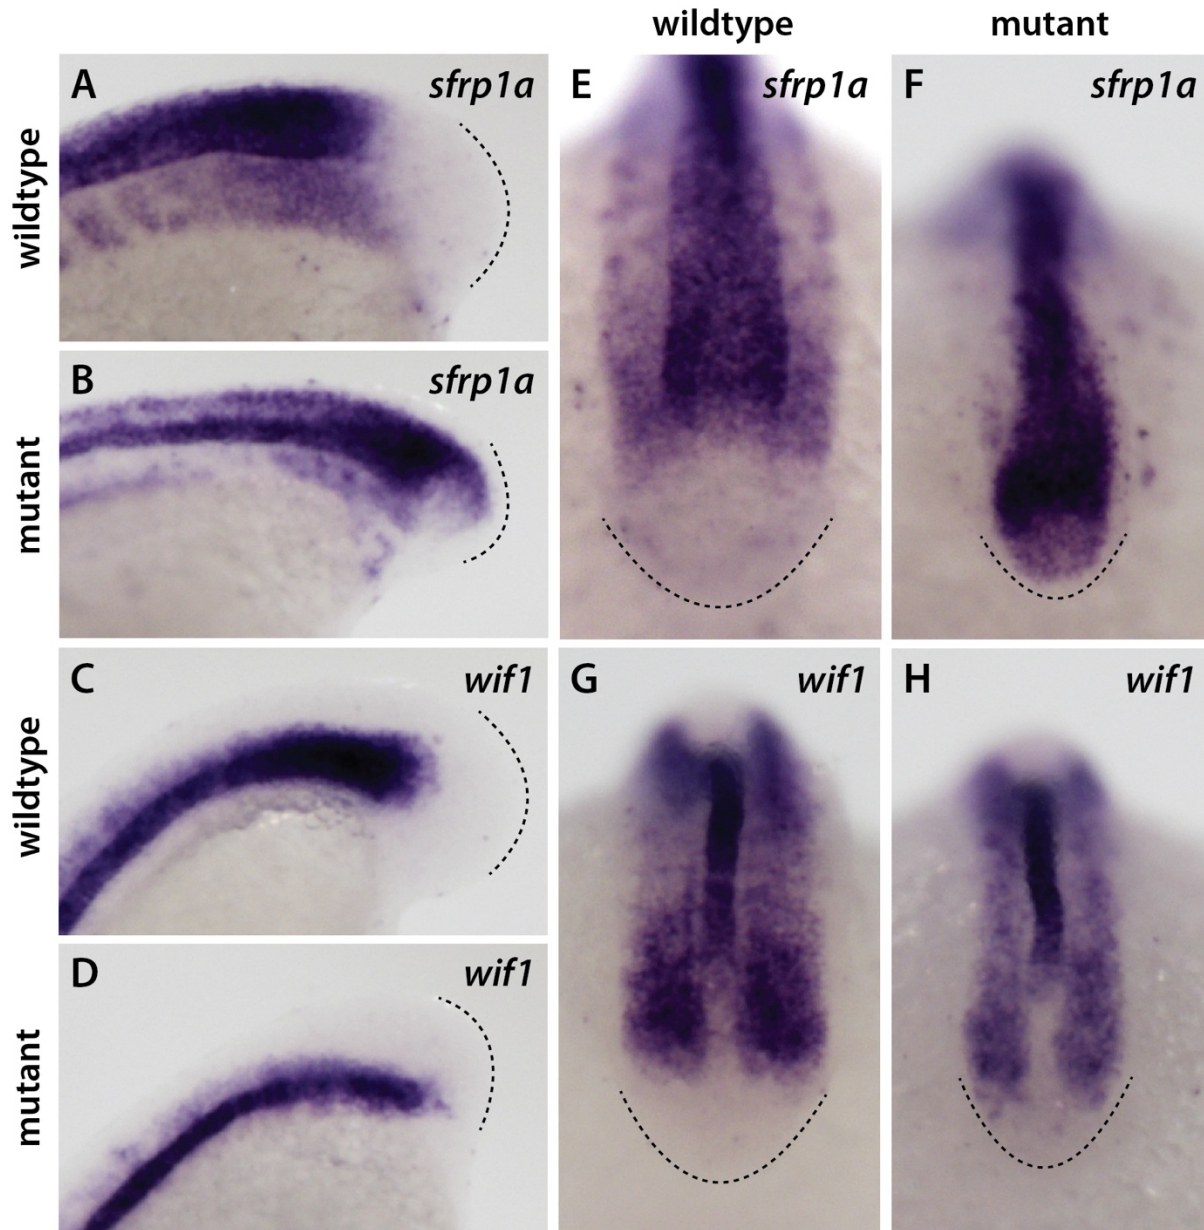

**Figure S5 Wnt inhibitors expressed more posteriorly in *hoxa13;ntl<sup>CS</sup>* embryos at 18.5° C. Refers to Figure 4.**

(A-H) In situ hybridization of wildtype and *hoxa13;ntl<sup>CS</sup>* embryos at 15s. Note that both genes expand more posteriorly in the mutants. Mutants with expanded expression: *sfrp1a* (81%, n=26) and *wif1* (79%, n=24). A-D are lateral views and panels E-H are dorsal views. The posterior limit of the tailbud is shown by a line.

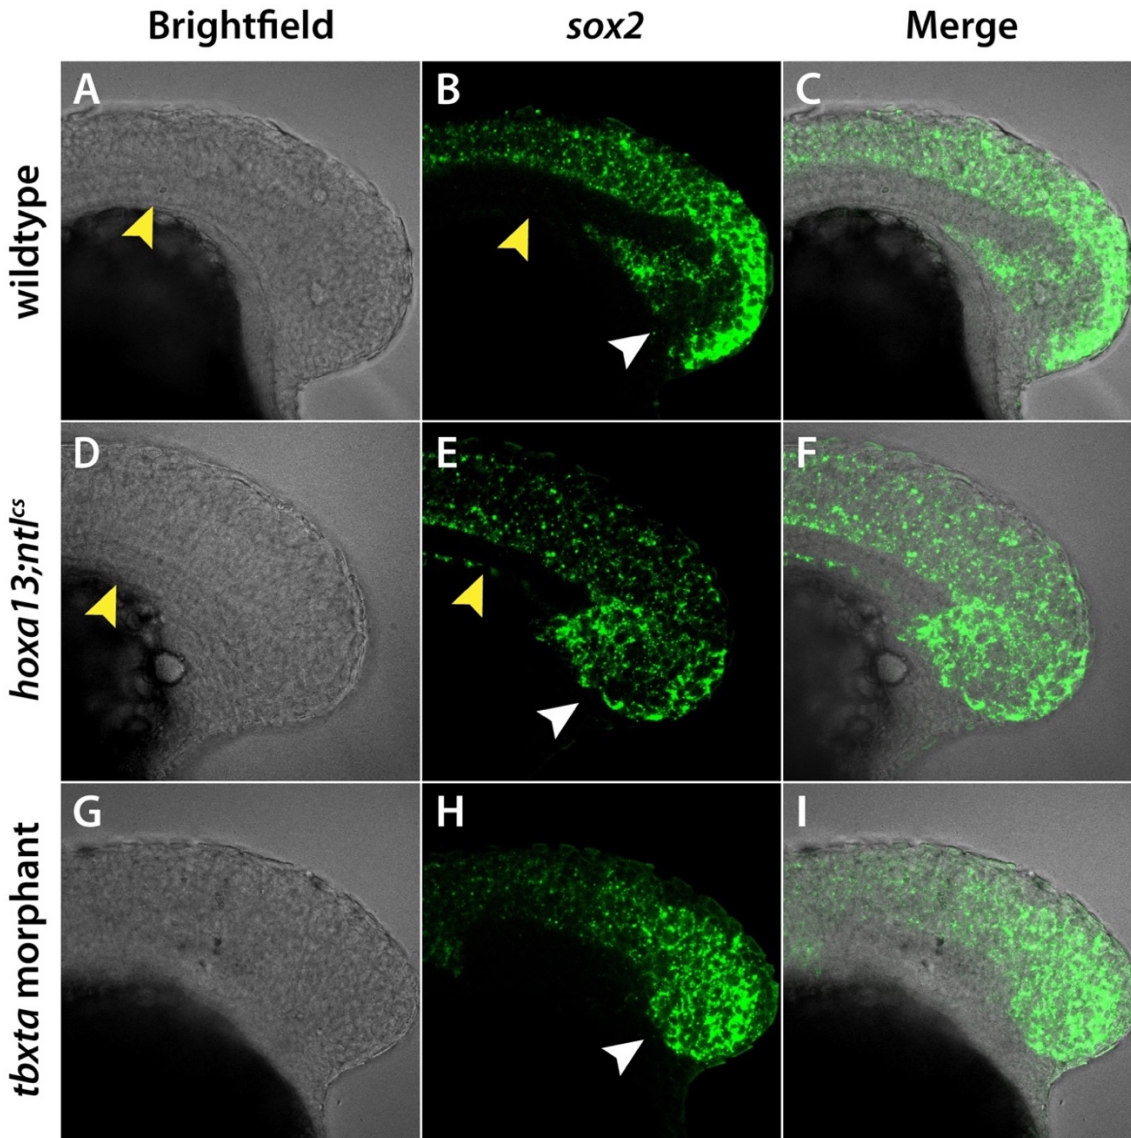

**Figure S6** *sox2* expression expands into the mesodermal progenitor region in *hoxa13;ntl<sup>cs</sup>* mutants at 18.5° C.

A-C) In wildtype embryos *sox2* is present in the NMps and neural tube, but absent from the mesodermal progenitor zone (white arrowhead). D-F) In *hoxa13;ntl<sup>cs</sup>* mutants *sox2* expands into the mesodermal progenitor zone (white arrowhead). F-I) in *tbxta/ntl* morphants *sox2* also expands into the mesodermal progenitor zone, as was previously shown for *tbxta/ntl* mutants (Martin and Kimelman, 2012). In both brightfield and fluorescent imaging the notochord is visible in wildtype and *hoxa13;ntl<sup>cs</sup>* mutants (yellow arrowheads in panels A,B,D and E) but is not observed in *tbxta/ntl* morphants. Embryos are at the 15s stage and are shown in a side view of a confocal section at the midline of the embryo.

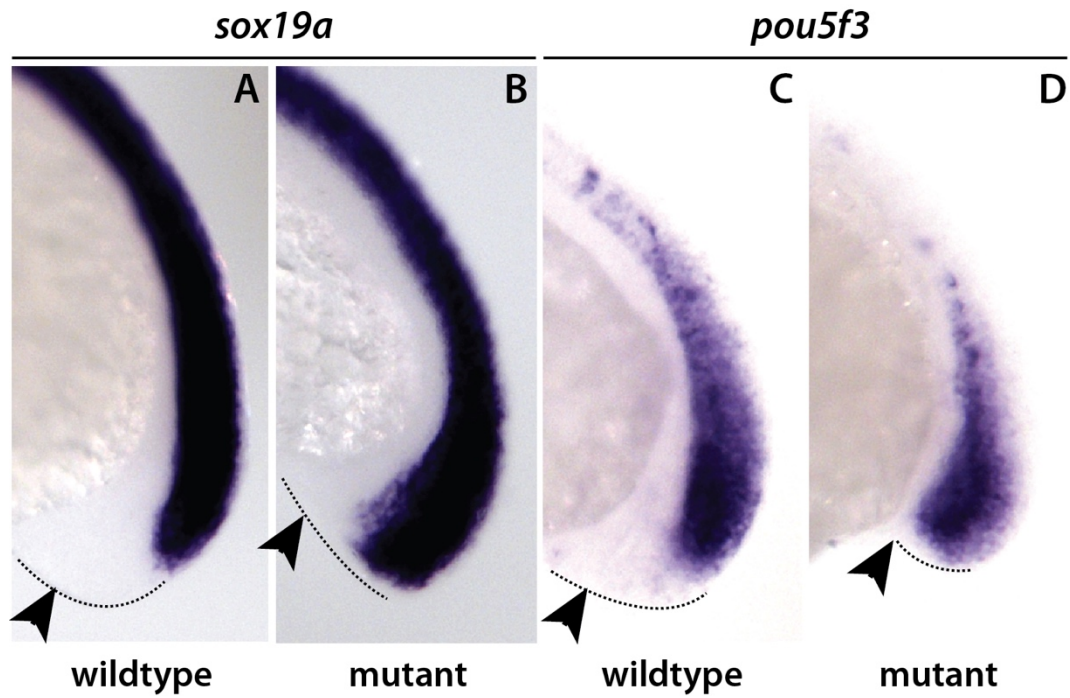

**Figure S7 *sox19a* and *pou5f3* expression expands into the mesodermal progenitor region in *hoxa13;ntl<sup>cs</sup>* mutants at 18.5° C. Refers to Figure 4.**

A-D) In situ hybridization of 15s wildtype and *hoxa13;ntl<sup>cs</sup>* embryos for the neural markers *sox19a* and *pou5f3*. As with *sox2*, expression expands into the prospective mesodermal territory in the *hoxa13;ntl<sup>cs</sup>* mutants.

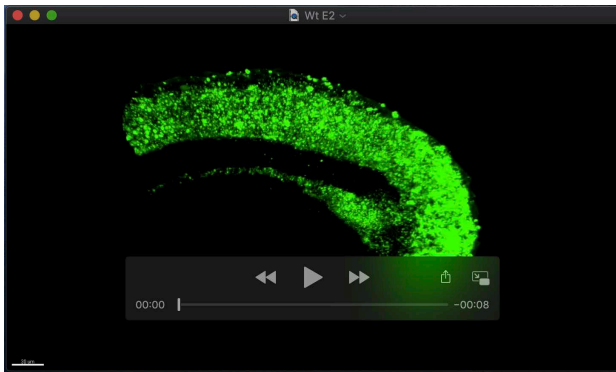

**Movie 1. *sox2* expression in a wildtype embryo.**  
The same embryo as in Figure S6A-C.

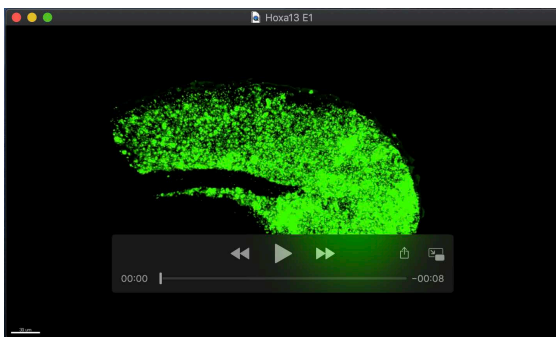

**Movie 2. *sox2* expression in a *hoxa13;ntl<sup>cs</sup>* mutant with a class 1 phenotype.**  
The same embryo as in Figure S6D-F.

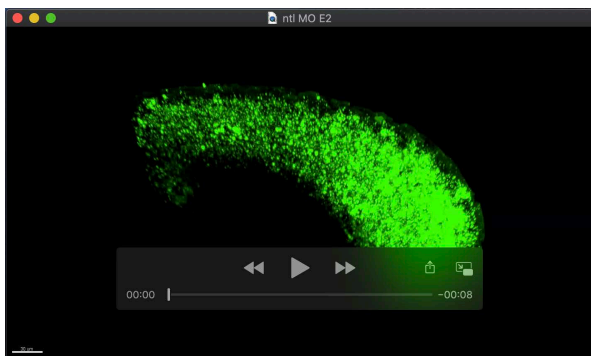

**Movie 3. *sox2* expression in a *tbxta/ntl* morphant.**  
The same embryo as in Figure S6G-I.
